# Supplementary material for: Comparing the Healing Abilities of Fluorapatite and Hydroxyapatite Ceramics in Regenerating Bone Tissue: An In Vivo Study
Source: MDPI journal article supplement (doi:10.3390/ma16175992), 2023-08-31
Supplement: s1 [file s1]

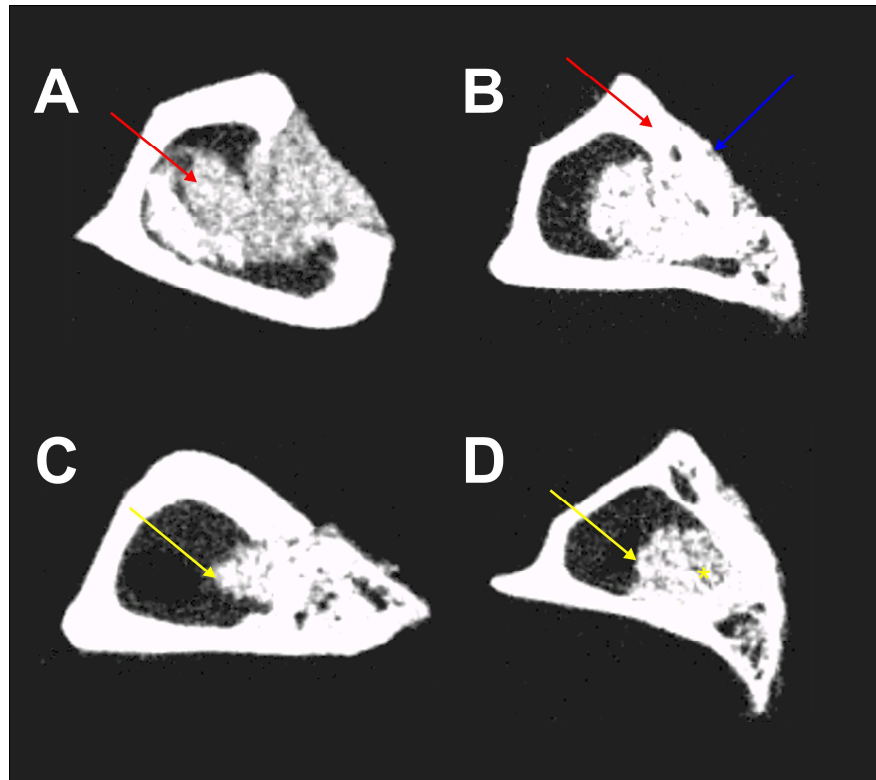

**Figure S1.** pQCT images of bone with filling: (A) FAP 3M; (B) FAP 6M; (C) HAP 3M; (D) HAP 6M. In FAP preparations, there is an increase in the density of the bone defect at the site of filling with the duration of observation (panels A and B, **red arrows**). The cortical layer of the defect is almost developed (panel B—**blue arrow**). In the HAP preparations, the density of the bone defect filling is slightly lower in the 6th month of observation than in the 3rd month of observation (panels C and D, **yellow arrows**). There are slight porosities within the restoration (panel D—**yellow asterisk**), with a fully developed cortical layer of the defect.

**Table S1.** Results of Tukey's post hoc test for TOT\_CNT results obtained by pQCT. Due to the large number of compared groups, only those for which a statistically significant difference was found are presented. Symbol meaning: \*  $p \leq 0.05$ , \*\*  $p \leq 0.01$ , \*\*\*  $p \leq 0.001$ , \*\*\*\*  $p \leq 0.0001$ .

| Groups Compared        | Significant? | Summary | Adjusted $p$ Value |
|------------------------|--------------|---------|--------------------|
| Control 3M vs. FAP Ref | Yes          | *       | 0.0243             |
| Control 3M vs. HAP 6M  | Yes          | *       | 0.0479             |
| Control 3M vs. HAP 3M  | Yes          | **      | 0.0064             |
| Control 6M vs. FAP 3M  | Yes          | ***     | 0.0001             |
| Control 3M vs. FAP 3M  | Yes          | ****    | <0.0001            |
| Control 3M vs. FAP 6M  | Yes          | ****    | <0.0001            |
| Control 6M vs. FAP 6M  | Yes          | ****    | <0.0001            |
| FAP 3M vs. HAP 6M      | Yes          | *       | 0.0432             |
| FAP 3M vs. HAP Ref     | Yes          | **      | 0.0031             |
| FAP 6M vs. HAP 3M      | Yes          | **      | 0.0039             |
| FAP 6M vs. HAP 6M      | Yes          | ***     | 0.0002             |
| FAP 6M vs. HAP Ref     | Yes          | ****    | <0.0001            |

**Table S2.** Results of Tukey's post hoc test for TOT\_DEN results obtained by pQCT. Due to the large number of compared groups, only those for which a statistically significant difference was found are presented. Symbol meaning: \*  $p \leq 0.05$ , \*\*  $p \leq 0.01$ .

| Groups Compared       | Significant? | Summary | Adjusted $p$ Value |
|-----------------------|--------------|---------|--------------------|
| Control 3M vs. FAP 6M | Yes          | *       | 0.0119             |
| Control 3M vs. HAP 3M | Yes          | *       | 0.0281             |
| Control 3M vs. HAP 6M | Yes          | *       | 0.0157             |
| Control 6M vs. FAP 6M | Yes          | **      | 0.0026             |
| Control 6M vs. HAP 3M | Yes          | **      | 0.0069             |
| Control 6M vs. HAP 6M | Yes          | **      | 0.0037             |
| FAP 6M vs. HAP Ref    | Yes          | **      | 0.0011             |
| HAP Ref vs. HAP 3M    | Yes          | **      | 0.0024             |
| HAP Ref vs. HAP 6M    | Yes          | **      | 0.0014             |
